# Supplementary material for: Condition screening and process investigation of aldose transformation in borate-containing acidic phosphate buffer system under microwave irradiation
Source: Royal Society of Chemistry journal article supplement (doi:10.1039/c4ra02612h), 2014-01-01
Supplement: c4ra02612h1.pdf [file c4ra02612h1.pdf]

## Electronic Supporting Information

### Condition Screening and Process Investigation of Aldose Transformation in Borate-containing Acidic Phosphate Buffer System under Microwave Irradiation

Yani Yan, Qingbin Wu, Xiao Guo, Jinhua Lu, Zhen Hua Li\*, Yahong Zhang\* and Yi Tang

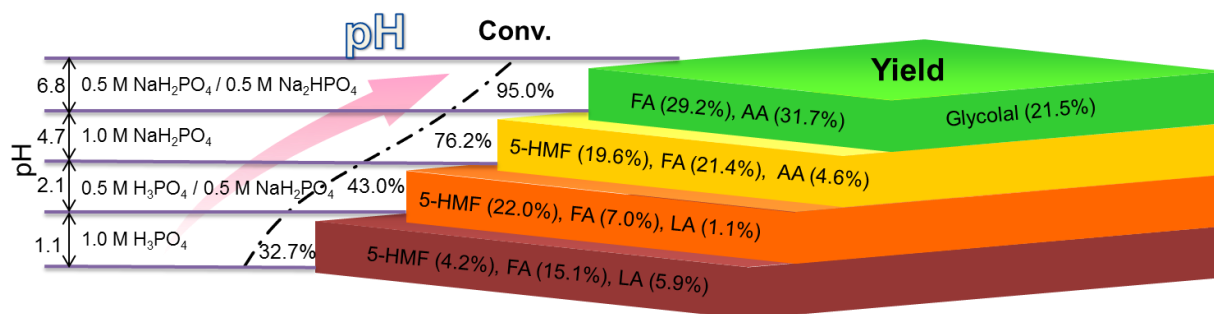

**Figure S1.** The conversion of glucose (10 wt.%) and the corresponding product distributions in PBS system without borate at different pH values under microwave irradiation. Conditions: reaction time = 90 min, and reaction temperature = 160 °C. 5-HMF: 5-hydromethylfurfural; LA: levulinic acid; FA: formic acid; AA: acetic acid; Conv.: Conversion.

**Table S1.** Influence of B/F ratio on the conversion of fructose into 5-HMF under microwave irradiation.<sup>[a]</sup>

| B/F | Conv. (%) | Y. 5-HMF (%) | S. 5-HMF (%) | Y. Glucose (%) |
|-----|-----------|--------------|--------------|----------------|
| 0   | 96.6      | 51.8         | 53.6         | 2.6            |
| 0.5 | 93.6      | 49.2         | 52.6         | 4.7            |
| 1   | 91.2      | 44.7         | 49.0         | 5.5            |
| 1.5 | 96.7      | 22.0         | 22.8         | 4.5            |

<sup>[a]</sup> Reaction conditions: 10 wt.% fructose in 0.5 M H<sub>3</sub>PO<sub>4</sub> / 0.5 M NaH<sub>2</sub>PO<sub>4</sub> PBS system, B/F = 0-1.5, reaction time = 30 min and reaction temperature = 160 °C

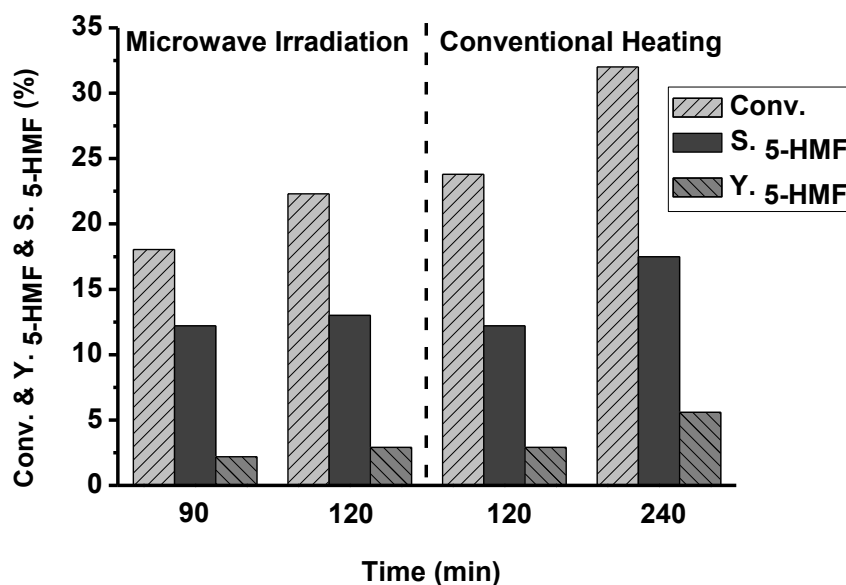

**Figure S2.** The conversions of 10 wt.% glucose in the pure water under microwave irradiation and conventional heating at 160 °C. 5-HMF: 5-hydroxymethylfurfural; Conv.: Conversion; Y.: Yield; S.: Selectivity.

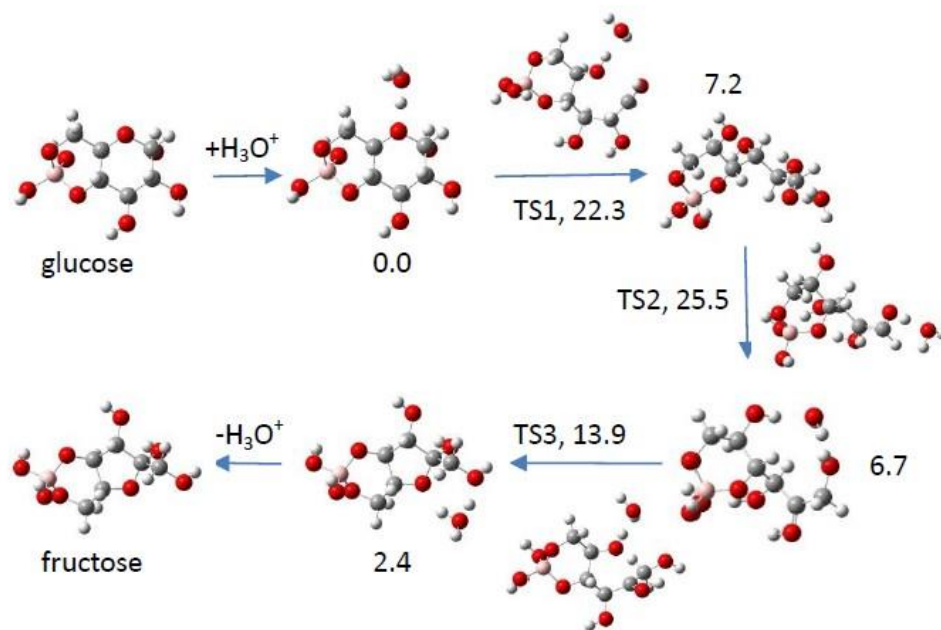

**Figure S3.** Gibbs free-energy profiles at 298.15 K and structures of the intermediates and transition states of the isomerization of glucose to fructose via 4,6-boroglucofuranose with the help of proton. The numbers are relative free energies (in kcal/mol) to the complex between D-glucose and  $\text{H}_3\text{O}^+$ .

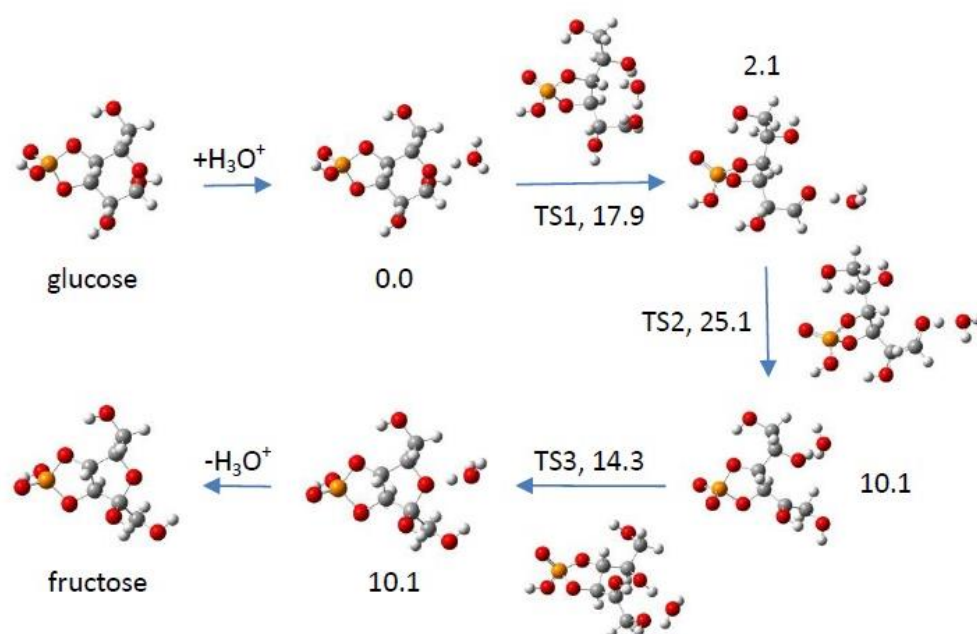

**Figure S4.** Gibbs free-energy profiles at 298.15 K and structures of the intermediates and transition states of the isomerization of glucose to fructose with the help of proton and  $\text{H}_3\text{PO}_4$ . The numbers are relative free energies (in kcal/mol) to the complex between D-glucose and  $\text{H}_3\text{O}^+$ .
